# Supplementary material for: Polycyclic antiaromatic hydrocarbons
Source: Royal Society of Chemistry journal article supplement (doi:10.1039/b808082h), 2008-01-01
Supplement: b808082h.pdf [file b808082h.pdf]

## Polycyclic Antiaromatic Hydrocarbons

Jonas Jusélius

Department of Chemistry, University of Tromsø,  
N-9037 Tromsø, Norway

Email: jonas.juselius@chem.uit.no

Dage Sundholm

Department of Chemistry,  
P.O. Box 55 (A.I. Virtasen Aukio 1),  
FIN-00014 University of Helsinki, Finland,

Email: sundholm@chem.helsinki.fi

### Molecular structures

Table 1: The Cartesian coordinates (in bohr) of **1** as obtained at the BP/SV(P) level.

|                   |                   |                  |   |
|-------------------|-------------------|------------------|---|
| -5.19044708243907 | -1.29904249589042 | 0.00000000000000 | c |
| -5.19044708243907 | 1.29904249589042  | 0.00000000000000 | c |
| -2.94517899246921 | 2.76979121208140  | 0.00000000000000 | c |
| -0.92612005660678 | 3.93549543221129  | 0.00000000000000 | c |
| 1.47021973918289  | 5.14458027833626  | 0.00000000000000 | c |
| 3.72022734325618  | 3.84553778244585  | 0.00000000000000 | c |
| 3.87129904907598  | 1.16570422012989  | 0.00000000000000 | c |
| 3.87129904907598  | -1.16570422012989 | 0.00000000000000 | c |
| 3.72022734325618  | -3.84553778244585 | 0.00000000000000 | c |
| 1.47021973918289  | -5.14458027833626 | 0.00000000000000 | c |
| -0.92612005660678 | -3.93549543221129 | 0.00000000000000 | c |
| -2.94517899246921 | -2.76979121208140 | 0.00000000000000 | c |
| -7.02636348752549 | -2.29413725460972 | 0.00000000000000 | h |
| -7.02636348752549 | 2.29413725460972  | 0.00000000000000 | h |
| 5.49996288602305  | 4.93794064911564  | 0.00000000000000 | h |
| 1.52640060150244  | 7.23207790372536  | 0.00000000000000 | h |
| 5.49996288602305  | -4.93794064911564 | 0.00000000000000 | h |
| 1.52640060150244  | -7.23207790372536 | 0.00000000000000 | h |

Table 2: The Cartesian coordinates (in bohr) of **2** as obtained at the BP/SV(P) level.

|                   |                   |                   |   |
|-------------------|-------------------|-------------------|---|
| 2.72066411120542  | 0.000000000000000 | 0.72059940072064  | c |
| 1.36093589958086  | 0.000000000000000 | 3.05215067955167  | c |
| -2.72066411120542 | 0.000000000000000 | 0.72059940072064  | c |
| 3.85993299894181  | 0.000000000000000 | -1.31347903290341 | c |
| 5.08850530169200  | 0.000000000000000 | -3.68913462654568 | c |
| 1.16794547875006  | 0.000000000000000 | -6.16624684791417 | c |
| -1.16794547875006 | 0.000000000000000 | -6.16624684791417 | c |
| -3.82959176255280 | 0.000000000000000 | -5.97079427159395 | c |
| -5.08850530169200 | 0.000000000000000 | -3.68913462654568 | c |
| -3.85993299894181 | 0.000000000000000 | -1.31347903290341 | c |
| 3.82959176255280  | 0.000000000000000 | -5.97079427159395 | c |
| 7.17734404361671  | 0.000000000000000 | -3.71211127614189 | h |
| -4.96036854969919 | 0.000000000000000 | -7.72678205140804 | h |
| -7.17734404361671 | 0.000000000000000 | -3.71211127614189 | h |
| 4.96036854969919  | 0.000000000000000 | -7.72678205140804 | h |
| -2.65253491396900 | 0.000000000000000 | 5.38847096630188  | c |
| 2.65253491396900  | 0.000000000000000 | 5.38847096630188  | c |
| 1.32554573588724  | 0.000000000000000 | 7.69092011862503  | c |
| 2.37828123262429  | 0.000000000000000 | 9.48818697740686  | h |
| -2.37828123262429 | 0.000000000000000 | 9.48818697740686  | h |
| -1.32554573588724 | 0.000000000000000 | 7.69092011862503  | c |
| -1.36093589958086 | 0.000000000000000 | 3.05215067955167  | c |
| -4.73360369592739 | 0.000000000000000 | 5.37676976660316  | h |
| 4.73360369592739  | 0.000000000000000 | 5.37676976660316  | h |

Table 3: The Cartesian coordinates (in bohr) of **3** as obtained at the BP/SV(P) level.

|                    |                   |                  |   |
|--------------------|-------------------|------------------|---|
| -4.65983612414185  | 2.72287482534033  | 0.00000000000000 | c |
| -2.33810234673720  | 1.35934245760178  | 0.00000000000000 | c |
| -4.65983612414185  | -2.72287482534033 | 0.00000000000000 | c |
| -6.69422940627598  | 3.86397804056242  | 0.00000000000000 | c |
| -9.06841434263069  | 5.09189387208706  | 0.00000000000000 | c |
| -11.54045742191924 | 1.16788139208346  | 0.00000000000000 | c |
| -11.54045742191924 | -1.16788139208346 | 0.00000000000000 | c |
| -11.34883799783377 | -3.82955180148283 | 0.00000000000000 | c |
| -9.06841434263069  | -5.09189387208706 | 0.00000000000000 | c |
| -6.69422940627598  | -3.86397804056242 | 0.00000000000000 | c |
| -11.34883799783377 | 3.82955180148283  | 0.00000000000000 | c |
| -9.09179749329279  | 7.18040192036553  | 0.00000000000000 | h |
| -13.10647174909692 | -4.95756479222356 | 0.00000000000000 | h |
| -9.09179749329279  | -7.18040192036553 | 0.00000000000000 | h |
| -13.10647174909692 | 4.95756479222356  | 0.00000000000000 | h |
| 0.00000000000000   | -2.64806268148488 | 0.00000000000000 | c |
| 0.00000000000000   | 2.64806268148488  | 0.00000000000000 | c |
| 2.33810234673720   | 1.35934245760178  | 0.00000000000000 | c |
| 4.65983612414185   | 2.72287482534033  | 0.00000000000000 | c |
| 6.69422940627597   | 3.86397804056242  | 0.00000000000000 | c |
| 9.06841434263068   | 5.09189387208707  | 0.00000000000000 | c |
| 11.34883799783377  | 3.82955180148283  | 0.00000000000000 | c |
| 11.54045742191923  | 1.16788139208346  | 0.00000000000000 | c |
| 11.54045742191923  | -1.16788139208346 | 0.00000000000000 | c |
| 11.34883799783377  | -3.82955180148283 | 0.00000000000000 | c |
| 9.06841434263068   | -5.09189387208707 | 0.00000000000000 | c |
| 6.69422940627597   | -3.86397804056242 | 0.00000000000000 | c |
| 4.65983612414185   | -2.72287482534033 | 0.00000000000000 | c |
| 2.33810234673720   | -1.35934245760178 | 0.00000000000000 | c |
| -2.33810234673720  | -1.35934245760178 | 0.00000000000000 | c |
| 0.00000000000000   | -4.72700619804895 | 0.00000000000000 | h |
| 0.00000000000000   | 4.72700619804895  | 0.00000000000000 | h |
| 9.09179749329278   | 7.18040192036553  | 0.00000000000000 | h |
| 13.10647174909692  | 4.95756479222356  | 0.00000000000000 | h |
| 13.10647174909692  | -4.95756479222356 | 0.00000000000000 | h |
| 9.09179749329278   | -7.18040192036553 | 0.00000000000000 | h |

Table 4: The Cartesian coordinates (in bohr) of **4** as obtained at the BP/SV(P) level.

|                    |                   |                   |   |
|--------------------|-------------------|-------------------|---|
| 10.68060538715213  | 0.000000000000000 | -9.48604554454647 | h |
| 15.26746493307019  | 0.000000000000000 | -9.64085407072962 | h |
| 14.33913026979104  | 0.000000000000000 | -7.77019443325418 | c |
| 15.86968029423325  | 0.000000000000000 | -5.58592768948395 | c |
| 17.06974832886582  | 0.000000000000000 | -3.58130306400801 | c |
| 18.26907033778161  | 0.000000000000000 | -1.19914624066270 | c |
| 16.95758032548155  | 0.000000000000000 | 1.05398527066623  | c |
| 14.29042558754771  | 0.000000000000000 | 1.21741781434292  | c |
| 11.95882344713566  | 0.000000000000000 | 1.28527040267867  | c |
| 9.26664039119071   | 0.000000000000000 | 1.30888031078653  | c |
| 9.16175642174802   | 0.000000000000000 | -3.38927675145006 | c |
| 10.32724668500039  | 0.000000000000000 | -5.40984699258785 | c |
| 11.73324077892245  | 0.000000000000000 | -7.68179911294640 | c |
| 20.35635331690010  | 0.000000000000000 | -1.13072990457969 | h |
| 18.04837890670656  | 0.000000000000000 | 2.83516270382289  | h |
| 7.92566501124801   | 0.000000000000000 | 3.61001915102657  | c |
| 5.20439800367946   | 0.000000000000000 | -0.93593925349533 | c |
| 5.25180047657007   | 0.000000000000000 | 3.70660047355637  | c |
| 3.85502450600156   | 0.000000000000000 | 1.37298413665570  | c |
| 3.96291615436013   | 0.000000000000000 | 6.05878279922691  | c |
| 2.76886864897515   | 0.000000000000000 | 8.06465737650219  | c |
| 1.30044045796914   | 0.000000000000000 | 10.28789550647686 | c |
| -1.30044045796914  | 0.000000000000000 | 10.28789550647686 | c |
| -2.76886864897515  | 0.000000000000000 | 8.06465737650219  | c |
| -3.96291615436013  | 0.000000000000000 | 6.05878279922691  | c |
| -3.85502450600156  | 0.000000000000000 | 1.37298413665570  | c |
| -1.16475189147725  | 0.000000000000000 | 1.36694762268392  | c |
| 1.16475189147725   | 0.000000000000000 | 1.36694762268392  | c |
| 7.86739589853559   | 0.000000000000000 | -1.02906711351649 | c |
| 2.29005561289473   | 0.000000000000000 | 12.12718278951939 | h |
| -2.29005561289473  | 0.000000000000000 | 12.12718278951939 | h |
| 8.99037223694874   | 0.000000000000000 | 5.39520923471373  | h |
| 4.13839671979594   | 0.000000000000000 | -2.72045724533834 | h |
| -7.92566501124801  | 0.000000000000000 | 3.61001915102657  | c |
| -5.20439800367946  | 0.000000000000000 | -0.93593925349533 | c |
| -9.26664039119071  | 0.000000000000000 | 1.30888031078653  | c |
| -7.86739589853559  | 0.000000000000000 | -1.02906711351649 | c |
| -11.95882344713566 | 0.000000000000000 | 1.28527040267867  | c |

|                    |                   |                   |   |
|--------------------|-------------------|-------------------|---|
| -14.29042558754771 | 0.000000000000000 | 1.21741781434292  | c |
| -16.95758032548155 | 0.000000000000000 | 1.05398527066623  | c |
| -18.26907033778161 | 0.000000000000000 | -1.19914624066270 | c |
| -17.06974832886582 | 0.000000000000000 | -3.58130306400801 | c |
| -15.86968029423325 | 0.000000000000000 | -5.58592768948395 | c |
| -14.33913026979104 | 0.000000000000000 | -7.77019443325418 | c |
| -11.73324077892245 | 0.000000000000000 | -7.68179911294640 | c |
| -10.32724668500039 | 0.000000000000000 | -5.40984699258785 | c |
| -9.16175642174802  | 0.000000000000000 | -3.38927675145006 | c |
| -5.25180047657007  | 0.000000000000000 | 3.70660047355637  | c |
| -8.99037223694874  | 0.000000000000000 | 5.39520923471373  | h |
| -4.13839671979594  | 0.000000000000000 | -2.72045724533834 | h |
| -18.04837890670656 | 0.000000000000000 | 2.83516270382289  | h |
| -20.35635331690010 | 0.000000000000000 | -1.13072990457969 | h |
| -15.26746493307019 | 0.000000000000000 | -9.64085407072962 | h |
| -10.68060538715213 | 0.000000000000000 | -9.48604554454647 | h |

Table 5: The Cartesian coordinates (in bohr) of **5** as obtained at the BP/SV(P) level.

|                    |                    |                   |   |
|--------------------|--------------------|-------------------|---|
| 0.0000000000000000 | -11.94905695497427 | 8.15556317051807  | c |
| 0.0000000000000000 | -9.26620274565038  | 8.18481450334599  | c |
| 0.0000000000000000 | -9.14007622682516  | 3.47954714196107  | c |
| 0.0000000000000000 | -14.28074941447340 | 8.04672130304173  | c |
| 0.0000000000000000 | -16.93409543982770 | 7.80258757247995  | c |
| 0.0000000000000000 | -16.89806431109653 | 3.15897346960343  | c |
| 0.0000000000000000 | -15.69180125279767 | 1.16003749999064  | c |
| 0.0000000000000000 | -14.22200554606860 | -1.08266388702077 | c |
| 0.0000000000000000 | -10.24265747408473 | 1.42558321990434  | c |
| 0.0000000000000000 | -18.16618749365564 | 5.50161151978578  | c |
| 0.0000000000000000 | -18.08649714274977 | 9.54423171477757  | h |
| 0.0000000000000000 | -20.25461913339247 | 5.49528972076493  | h |
| 0.0000000000000000 | -5.19840624877139  | 5.94295699093818  | c |
| 0.0000000000000000 | -7.92285082827827  | 10.49085177544614 | c |
| 0.0000000000000000 | -5.25466142943794  | 10.58708965866069 | c |
| 0.0000000000000000 | -3.96512791018297  | 12.93900504530236 | c |
| 0.0000000000000000 | -2.77073728860443  | 14.94485619322804 | c |
| 0.0000000000000000 | -1.30512208453647  | 17.16923416602835 | c |
| 0.0000000000000000 | 1.30512208453647   | 17.16923416602835 | c |
| 0.0000000000000000 | 2.77073728860443   | 14.94485619322804 | c |
| 0.0000000000000000 | 3.96512791018297   | 12.93900504530236 | c |
| 0.0000000000000000 | 5.25466142943794   | 10.58708965866069 | c |
| 0.0000000000000000 | 1.16555794947349   | 8.25438687856186  | c |
| 0.0000000000000000 | -1.16555794947349  | 8.25438687856186  | c |
| 0.0000000000000000 | -3.85344394081366  | 8.24928064467410  | c |
| 0.0000000000000000 | -7.86538116481490  | 5.84638671085420  | c |
| 0.0000000000000000 | -4.13106359820571  | 4.15928062992730  | h |
| 0.0000000000000000 | -8.99019042866459  | 12.27464655105168 | h |
| 0.0000000000000000 | -2.29740357378836  | 19.00695451388146 | h |
| 0.0000000000000000 | 2.29740357378836   | 19.00695451388146 | h |
| 0.0000000000000000 | 7.92285082827827   | 10.49085177544614 | c |
| 0.0000000000000000 | 5.19840624877139   | 5.94295699093818  | c |
| 0.0000000000000000 | 9.26620274565038   | 8.18481450334599  | c |
| 0.0000000000000000 | 7.86538116481490   | 5.84638671085420  | c |
| 0.0000000000000000 | 11.94905695497427  | 8.15556317051807  | c |
| 0.0000000000000000 | 14.28074941447340  | 8.04672130304173  | c |
| 0.0000000000000000 | 16.93409543982770  | 7.80258757247995  | c |
| 0.0000000000000000 | 18.16618749365564  | 5.50161151978578  | c |

|                    |                    |                    |   |
|--------------------|--------------------|--------------------|---|
| 0.0000000000000000 | 16.89806431109653  | 3.15897346960343   | c |
| 0.0000000000000000 | 15.69180125279767  | 1.16003749999064   | c |
| 0.0000000000000000 | 11.50563429690753  | -0.94706708741289  | c |
| 0.0000000000000000 | 10.24265747408473  | 1.42558321990434   | c |
| 0.0000000000000000 | 9.14007622682516   | 3.47954714196107   | c |
| 0.0000000000000000 | 3.85344394081366   | 8.24928064467410   | c |
| 0.0000000000000000 | 18.08649714274977  | 9.54423171477757   | h |
| 0.0000000000000000 | 20.25461913339247  | 5.49528972076493   | h |
| 0.0000000000000000 | 8.99019042866459   | 12.27464655105168  | h |
| 0.0000000000000000 | 4.13106359820571   | 4.15928062992730   | h |
| 0.0000000000000000 | 15.39372182731925  | -3.48901820486247  | c |
| 0.0000000000000000 | 10.10124281805269  | -3.22350186652623  | c |
| 0.0000000000000000 | 13.99241864281883  | -5.75338324571542  | c |
| 0.0000000000000000 | 11.27017246603379  | -5.61750881328397  | c |
| 0.0000000000000000 | -10.10124281805269 | -3.22350186652623  | c |
| 0.0000000000000000 | -15.39372182731925 | -3.48901820486247  | c |
| 0.0000000000000000 | -11.27017246603379 | -5.61750881328397  | c |
| 0.0000000000000000 | -13.99241864281883 | -5.75338324571542  | c |
| 0.0000000000000000 | 15.23561149880770  | -8.14170190153655  | c |
| 0.0000000000000000 | 16.26799858925739  | -10.23351201644111 | c |
| 0.0000000000000000 | 17.37711239322667  | -12.66454660643951 | c |
| 0.0000000000000000 | 16.00380182816132  | -14.88083193305418 | c |
| 0.0000000000000000 | 13.33742134068978  | -14.94085338698560 | c |
| 0.0000000000000000 | 11.00409508007673  | -14.82437214874848 | c |
| 0.0000000000000000 | 8.35716682776009   | -14.49752766553339 | c |
| 0.0000000000000000 | 7.21253177533738   | -12.15461026463171 | c |
| 0.0000000000000000 | 8.55752020391507   | -9.84636373511640  | c |
| 0.0000000000000000 | 9.79501048272718   | -7.86886003429403  | c |
| 0.0000000000000000 | -9.79501048272718  | -7.86886003429403  | c |
| 0.0000000000000000 | -8.55752020391507  | -9.84636373511640  | c |
| 0.0000000000000000 | -7.21253177533738  | -12.15461026463171 | c |
| 0.0000000000000000 | -8.35716682776009  | -14.49752766553339 | c |
| 0.0000000000000000 | -11.00409508007673 | -14.82437214874848 | c |
| 0.0000000000000000 | -13.33742134068978 | -14.94085338698560 | c |
| 0.0000000000000000 | -16.00380182816132 | -14.88083193305418 | c |
| 0.0000000000000000 | -17.37711239322667 | -12.66454660643951 | c |
| 0.0000000000000000 | -16.26799858925739 | -10.23351201644111 | c |
| 0.0000000000000000 | -15.23561149880770 | -8.14170190153655  | c |
| 0.0000000000000000 | 14.22200554606860  | -1.08266388702077  | c |

|                    |                    |                    |   |
|--------------------|--------------------|--------------------|---|
| 0.0000000000000000 | -11.50563429690753 | -0.94706708741289  | c |
| 0.0000000000000000 | 17.47009418959185  | -3.59143515620676  | h |
| 0.0000000000000000 | 8.02502450521444   | -3.11952396032137  | h |
| 0.0000000000000000 | -8.02502450521444  | -3.11952396032137  | h |
| 0.0000000000000000 | -17.47009418959185 | -3.59143515620676  | h |
| 0.0000000000000000 | 19.46192545654867  | -12.79068978304444 | h |
| 0.0000000000000000 | 17.04424418881683  | -16.69177874036530 | h |
| 0.0000000000000000 | 7.14074331376990   | -16.19509414083609 | h |
| 0.0000000000000000 | 5.12552463364855   | -12.07152041299475 | h |
| 0.0000000000000000 | -5.12552463364855  | -12.07152041299475 | h |
| 0.0000000000000000 | -7.14074331376990  | -16.19509414083609 | h |
| 0.0000000000000000 | -17.04424418881683 | -16.69177874036530 | h |
| 0.0000000000000000 | -19.46192545654867 | -12.79068978304444 | h |



Table 6: The Cartesian coordinates (in bohr) of **6** as obtained at the BP/SV(P) level.

|                    |                    |                  |   |
|--------------------|--------------------|------------------|---|
| 16.05961136926673  | -3.91632949452169  | 0.00000000000000 | c |
| 13.71672163087058  | -5.22063051931229  | 0.00000000000000 | c |
| 11.33184884937559  | -1.16597646448472  | 0.00000000000000 | c |
| 18.08545703442164  | -2.75685259469959  | 0.00000000000000 | c |
| 20.31849906329913  | -1.30482886654317  | 0.00000000000000 | c |
| 18.08545703442164  | 2.75685259469959   | 0.00000000000000 | c |
| 16.05961136926673  | 3.91632949452169   | 0.00000000000000 | c |
| 13.71672163087058  | 5.22063051931229   | 0.00000000000000 | c |
| 11.33184884937559  | 1.16597646448472   | 0.00000000000000 | c |
| 20.31849906329913  | 1.30482886654317   | 0.00000000000000 | c |
| 22.15328616742653  | -2.30225947093994  | 0.00000000000000 | h |
| 22.15328616742653  | 2.30225947093994   | 0.00000000000000 | h |
| 9.07261591938260   | -5.23807724330963  | 0.00000000000000 | c |
| 13.66235876325086  | -7.88796650972813  | 0.00000000000000 | c |
| 11.37955946893208  | -9.26871412931729  | 0.00000000000000 | c |
| 11.42144651647942  | -11.94986667342953 | 0.00000000000000 | c |
| 11.43023289870971  | -14.28403893351132 | 0.00000000000000 | c |
| 11.28926447766721  | -16.94392192231578 | 0.00000000000000 | c |
| 9.02923458563191   | -18.24875078885896 | 0.00000000000000 | c |
| 6.65522413571192   | -17.04089152821092 | 0.00000000000000 | c |
| 4.63816485278730   | -15.86619616795122 | 0.00000000000000 | c |
| 2.33716216193849   | -14.48934464862959 | 0.00000000000000 | c |
| 4.65615918622926   | -10.39665720764708 | 0.00000000000000 | c |
| 6.67568966314633   | -9.23068074316236  | 0.00000000000000 | c |
| 9.01728712237253   | -7.90813813452522  | 0.00000000000000 | c |
| 11.35729208232159  | -3.85513065393027  | 0.00000000000000 | c |
| 7.27196377943091   | -4.19847024559164  | 0.00000000000000 | h |
| 15.46288760816017  | -8.92750232302020  | 0.00000000000000 | h |
| 13.07045827165058  | -18.03417886282780 | 0.00000000000000 | h |
| 9.08282789577594   | -20.33643833376776 | 0.00000000000000 | h |
| 0.00000000000000   | -15.77593301945626 | 0.00000000000000 | c |
| 0.00000000000000   | -10.47615448661925 | 0.00000000000000 | c |
| -2.33716216193850  | -14.48934464862959 | 0.00000000000000 | c |
| -2.34000495994907  | -11.76326878845549 | 0.00000000000000 | c |
| -4.63816485278731  | -15.86619616795122 | 0.00000000000000 | c |
| -6.65522413571193  | -17.04089152821091 | 0.00000000000000 | c |
| -9.02923458563191  | -18.24875078885895 | 0.00000000000000 | c |
| -11.28926447766721 | -16.94392192231577 | 0.00000000000000 | c |

|                    |                    |                  |   |
|--------------------|--------------------|------------------|---|
| -11.43023289870971 | -14.28403893351132 | 0.00000000000000 | c |
| -11.42144651647942 | -11.94986667342953 | 0.00000000000000 | c |
| -9.01728712237252  | -7.90813813452523  | 0.00000000000000 | c |
| -6.67568966314633  | -9.23068074316235  | 0.00000000000000 | c |
| -4.65615918622926  | -10.39665720764708 | 0.00000000000000 | c |
| 2.34000495994907   | -11.76326878845549 | 0.00000000000000 | c |
| -9.08282789577594  | -20.33643833376775 | 0.00000000000000 | h |
| -13.07045827165058 | -18.03417886282780 | 0.00000000000000 | h |
| 0.00000000000000   | -17.85500464604040 | 0.00000000000000 | h |
| 0.00000000000000   | -8.39694049118329  | 0.00000000000000 | h |
| -13.66235876325086 | -7.88796650972813  | 0.00000000000000 | c |
| -9.07261591938260  | -5.23807724330963  | 0.00000000000000 | c |
| -13.71672163087058 | -5.22063051931229  | 0.00000000000000 | c |
| -11.35729208232159 | -3.85513065393027  | 0.00000000000000 | c |
| 9.07261591938260   | 5.23807724330963   | 0.00000000000000 | c |
| 13.66235876325086  | 7.88796650972813   | 0.00000000000000 | c |
| 9.01728712237253   | 7.90813813452522   | 0.00000000000000 | c |
| 11.37955946893208  | 9.26871412931729   | 0.00000000000000 | c |
| -16.05961136926673 | -3.91632949452169  | 0.00000000000000 | c |
| -18.08545703442164 | -2.75685259469960  | 0.00000000000000 | c |
| -20.31849906329913 | -1.30482886654318  | 0.00000000000000 | c |
| -20.31849906329913 | 1.30482886654318   | 0.00000000000000 | c |
| -18.08545703442164 | 2.75685259469960   | 0.00000000000000 | c |
| -16.05961136926673 | 3.91632949452169   | 0.00000000000000 | c |
| -13.71672163087058 | 5.22063051931229   | 0.00000000000000 | c |
| -11.33184884937558 | 1.16597646448472   | 0.00000000000000 | c |
| -11.33184884937558 | -1.16597646448472  | 0.00000000000000 | c |
| 6.67568966314633   | 9.23068074316236   | 0.00000000000000 | c |
| 4.65615918622926   | 10.39665720764708  | 0.00000000000000 | c |
| 2.33716216193849   | 14.48934464862959  | 0.00000000000000 | c |
| 4.63816485278730   | 15.86619616795122  | 0.00000000000000 | c |
| 6.65522413571192   | 17.04089152821092  | 0.00000000000000 | c |
| 9.02923458563191   | 18.24875078885896  | 0.00000000000000 | c |
| 11.28926447766721  | 16.94392192231578  | 0.00000000000000 | c |
| 11.43023289870971  | 14.28403893351132  | 0.00000000000000 | c |
| 11.42144651647942  | 11.94986667342953  | 0.00000000000000 | c |
| -11.37955946893208 | -9.26871412931729  | 0.00000000000000 | c |
| 11.35729208232159  | 3.85513065393027   | 0.00000000000000 | c |
| -15.46288760816016 | -8.92750232302020  | 0.00000000000000 | h |

|                    |                   |                  |   |
|--------------------|-------------------|------------------|---|
| -7.27196377943091  | -4.19847024559164 | 0.00000000000000 | h |
| 7.27196377943091   | 4.19847024559164  | 0.00000000000000 | h |
| 15.46288760816017  | 8.92750232302020  | 0.00000000000000 | h |
| -22.15328616742653 | -2.30225947093995 | 0.00000000000000 | h |
| -22.15328616742653 | 2.30225947093995  | 0.00000000000000 | h |
| 9.08282789577594   | 20.33643833376776 | 0.00000000000000 | h |
| 13.07045827165058  | 18.03417886282780 | 0.00000000000000 | h |
| -9.07261591938260  | 5.23807724330963  | 0.00000000000000 | c |
| -13.66235876325086 | 7.88796650972813  | 0.00000000000000 | c |
| -9.01728712237252  | 7.90813813452523  | 0.00000000000000 | c |
| -11.37955946893208 | 9.26871412931729  | 0.00000000000000 | c |
| 0.00000000000000   | 10.47615448661925 | 0.00000000000000 | c |
| 0.00000000000000   | 15.77593301945626 | 0.00000000000000 | c |
| -2.34000495994907  | 11.76326878845549 | 0.00000000000000 | c |
| -2.33716216193850  | 14.48934464862959 | 0.00000000000000 | c |
| -11.35729208232159 | 3.85513065393027  | 0.00000000000000 | c |
| 2.34000495994907   | 11.76326878845549 | 0.00000000000000 | c |
| -6.67568966314633  | 9.23068074316235  | 0.00000000000000 | c |
| -11.42144651647942 | 11.94986667342953 | 0.00000000000000 | c |
| -4.65615918622926  | 10.39665720764708 | 0.00000000000000 | c |
| -4.63816485278731  | 15.86619616795122 | 0.00000000000000 | c |
| -11.43023289870971 | 14.28403893351132 | 0.00000000000000 | c |
| -6.65522413571193  | 17.04089152821091 | 0.00000000000000 | c |
| -9.02923458563191  | 18.24875078885895 | 0.00000000000000 | c |
| -11.28926447766721 | 16.94392192231577 | 0.00000000000000 | c |
| -7.27196377943091  | 4.19847024559164  | 0.00000000000000 | h |
| -15.46288760816016 | 8.92750232302020  | 0.00000000000000 | h |
| 0.00000000000000   | 8.39694049118329  | 0.00000000000000 | h |
| 0.00000000000000   | 17.85500464604040 | 0.00000000000000 | h |
| -9.08282789577594  | 20.33643833376775 | 0.00000000000000 | h |
| -13.07045827165058 | 18.03417886282780 | 0.00000000000000 | h |
